# Supplementary material
Source: PubMed Central journal article supplement (PMC4266461)
Supplement: NIHMS61486-supplement-01.pdf [file NIHMS61486-supplement-01.pdf]

**Supplementary Fig. S1.** Growth of '*Candidatus* Limnoluna rubra' strain MWH-EgelM2-3 and an accompanying non-actinobacterial strain on NSY agar plates. The colonies of the candidate species are red-pigmented and those of the other strain are unpigmented. The plated liquid culture contained about  $10^9$  cells  $\text{ml}^{-1}$  and was dominated by the actinobacterial strain (>90 % of cells). The photo shows a section of a plate that received an inoculum of about  $10^5$  cells. The strain of the candidate species grows well when in direct contact with the non-pigmented colonies; however, the size of the actinobacterial colonies decreases with distance from the non-pigmented colonies and, beyond a crucial distance from these colonies, no actinobacterial growth occurs.

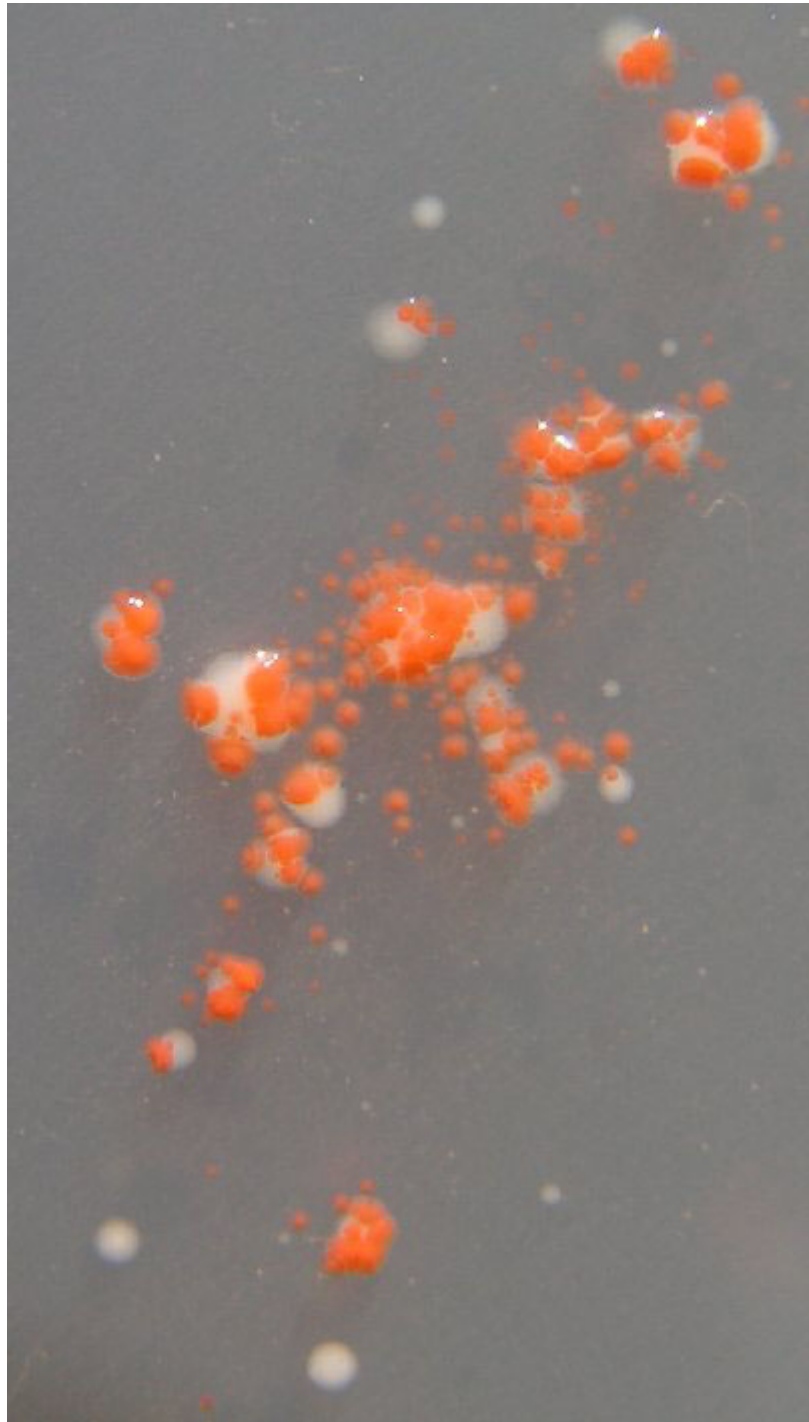

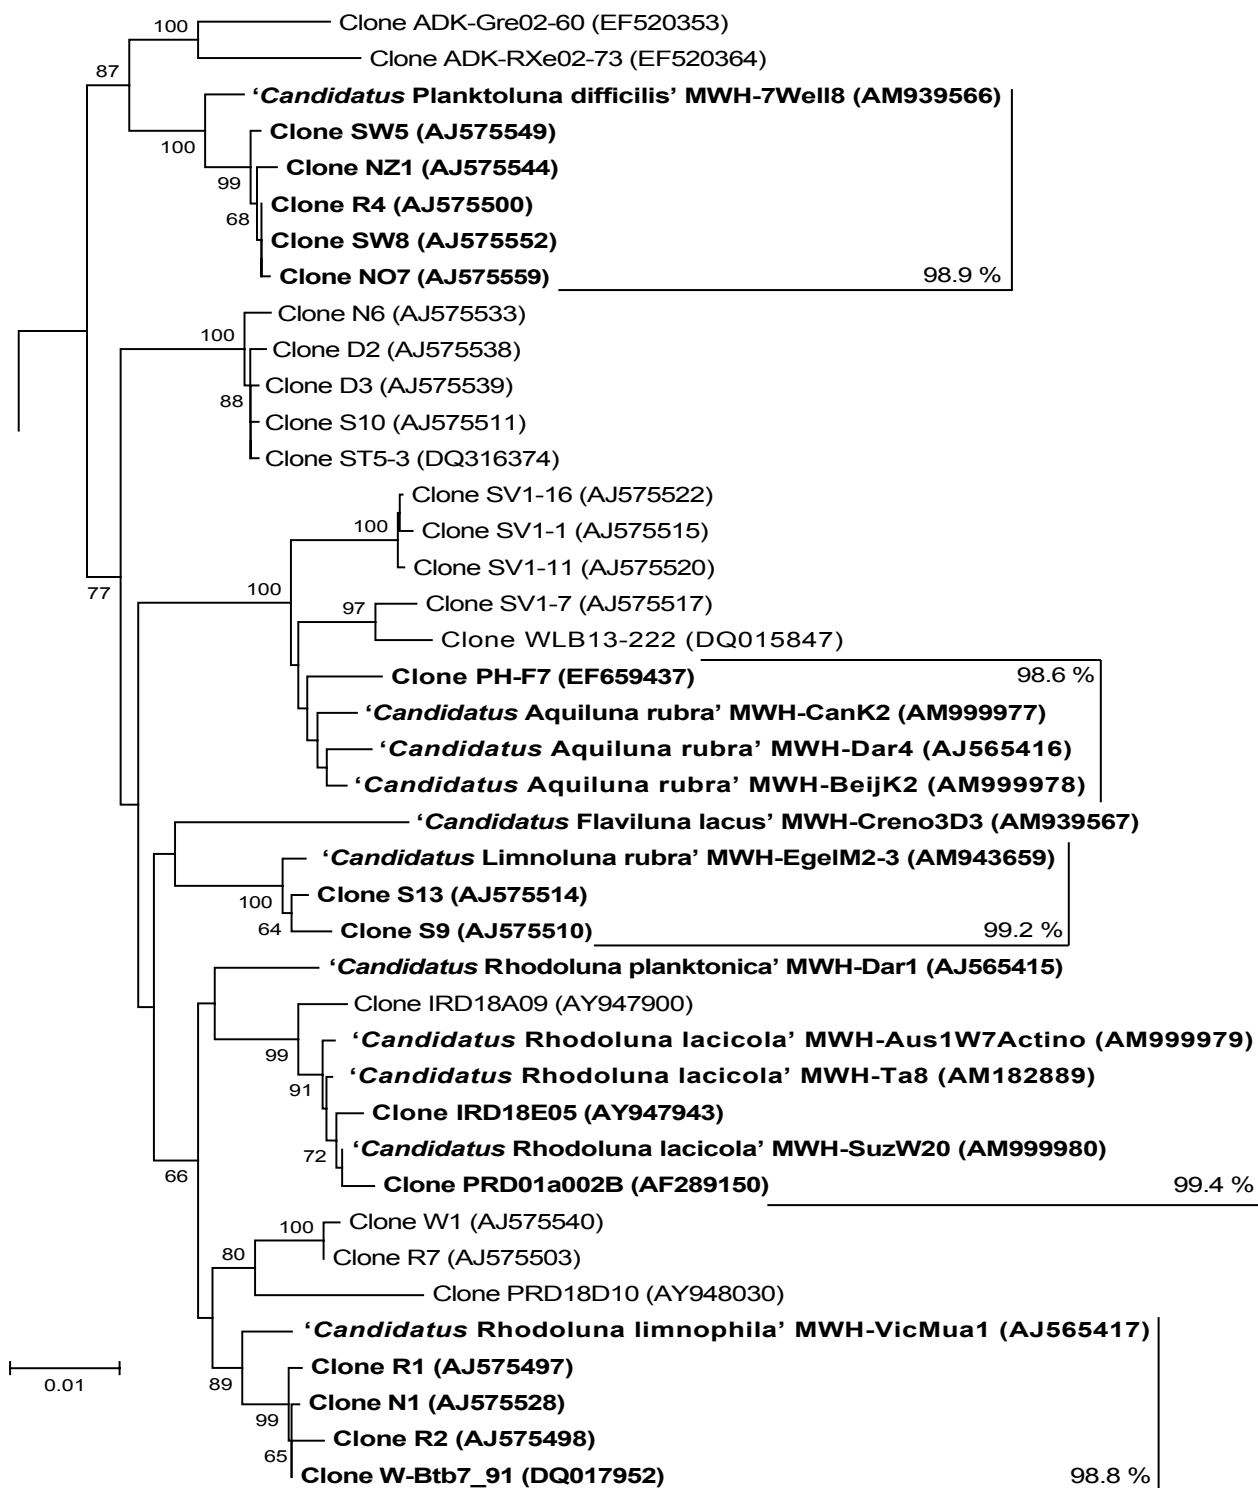

**Supplementary Fig. S2.** Neighbour-joining tree based on almost full-length 16S rRNA gene sequences (*E. coli* positions 47–1465). The tree reconstructs the phylogenetic relationships between the novel candidate species and environmental sequences of uncultured actinobacteria. The phylogenetic group presented in the tree represents almost the entire Luna-1 cluster (Hahn *et al.*, 2003) and the major part of the acII group (Warnecke *et al.*, 2004). Sequences that contain the diagnostic oligonucleotide sequences for discrimination of the candidate species from other taxa are shown in bold, and sequence similarities within the respective groups are presented (as percentage identity). Bootstrap values represent percentage support of nodes based on 1000 resamplings (only values  $\geq 60\%$  are shown). Bar, 1 % estimated sequence divergence. The sequence of *Brevibacterium linens* DSM 20425<sup>T</sup> (GenBank accession no. X77451) served as an outgroup (not shown). References cited are given in the main paper.

**Supplementary Table S1.** Pairwise comparison of the sequence similarity of 16S rRNA genes of the candidate species

Values are percentages of sequence identity.

| Strain                                                           | 1     | 2     | 3     | 4     | 5     | 6     | 7     |
|------------------------------------------------------------------|-------|-------|-------|-------|-------|-------|-------|
| 1. ' <i>Candidatus</i> Aquiluna rubra' strain MWH-Dar4           | (100) | 95.5  | 96.9  | 96.2  | 96.0  | 96.2  | 96.9  |
| 2. ' <i>Candidatus</i> Flaviluna lacus' strain MWH-Creno3D3      |       | (100) | 96.8  | 96.5  | 96.4  | 95.9  | 95.8  |
| 3. ' <i>Candidatus</i> Limnoluna rubra' strain MWH-EgelM2-3      |       |       | (100) | 97.1  | 97.1  | 97.6  | 97.4  |
| 4. ' <i>Candidatus</i> Rhodoluna limnophila' strain MWH-VicMua1  |       |       |       | (100) | 98.3  | 97.9  | 96.6  |
| 5. ' <i>Candidatus</i> Rhodoluna planktonica' strain MWH-Dar1    |       |       |       |       | (100) | 97.8  | 96.8  |
| 6. ' <i>Candidatus</i> Rhodoluna lacicola' strain MWH-Ta8        |       |       |       |       |       | (100) | 96.0  |
| 7. ' <i>Candidatus</i> Planktoluna difficilis' strain MWH-7Well8 |       |       |       |       |       |       | (100) |

**Supplementary Table S2.** Geographical, limnological and climatic characteristics of habitats from which the strains representing the seven candidate species were isolated

| Strain                                                 | Source of isolation         | Geographical coordinates          | Habitat characteristics                                          | Climate     |
|--------------------------------------------------------|-----------------------------|-----------------------------------|------------------------------------------------------------------|-------------|
| ' <i>Candidatus</i> Planktoluna difficilis' MWH-7Well8 | Lake Taihu, China           | 31° 26' 5.78" N 120° 19' 14.36" E | Large, shallow, eutrophic to hypertrophic lake                   | Subtropical |
| ' <i>Candidatus</i> Aquiluna rubra' MWH-Dar4           | Pond, Tanzania              | 6° 49' 16.83" S 39° 16' 46.31" E  | Small, artificial pond on the university campus in Dar es Saalam | Tropical    |
| ' <i>Candidatus</i> Limnoluna rubra' MWH-EgelM2-3      | Lake Egelsee, Austria       | 47° 57' 43.70" N 13° 7' 28.56" E  | Shallow, eutrophic, slightly alkaline lake                       | Temperate   |
| ' <i>Candidatus</i> Flaviluna lacustris' MWH-Creno3D3  | Lake Creno, Corsica, France | 42° 12' 17.32" N 8° 56' 44.73" E  | Oligotrophic, montane lake                                       | Temperate   |
| ' <i>Candidatus</i> Rhodoluna lacicola' MWH-Ta8        | Lake Taihu, China           | 31° 26' 5.78" N 120° 19' 14.36" E | Large, shallow, eutrophic to hypertrophic lake                   | Subtropical |
| ' <i>Candidatus</i> Rhodoluna limnophila' MWH-VicMua1  | Lake Victoria, Tanzania     | 2° 34' 32.41" S 32° 51' 19.68" E  | Large, deep, tropical lake with circumneutral pH                 | Tropical    |
| ' <i>Candidatus</i> Rhodoluna planktonica' MWH-Dar1    | Pond, Tanzania              | 6° 49' 16.83" S 39° 16' 46.31" E  | Small, artificial pond on the university campus in Dar es Saalam | Tropical    |
